# Supplementary material
Source: PubMed Central journal article supplement (PMC3968385)
Supplement: supp_blood-2013-10-535393_blood-2013-10-535393-1.pdf [file supp_blood-2013-10-535393_blood-2013-10-535393-1.pdf]

## Supplementary Figure 1

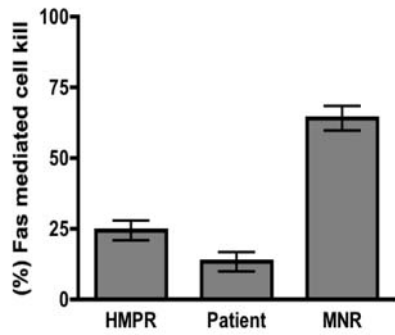

Figure Legend: Supplementary Figure 1. FAS-mediated apoptosis assays. Cell kill (K) as a percentage of FAS-stimulated (S) to unstimulated (U) peripheral blood lymphocytes from 18 ALPS-FAS patients, 30 HMPRs and 15 MNRs used as controls according to the equation  $K = 1 - S/U \times 100\%$ . The bars show average  $\pm$  standard deviation.
